# Supplementary material for: One-pot synthesis of Au–Fe2O3@SiO2 core–shell nanoreactors for CO oxidation
Source: Royal Society of Chemistry journal article supplement (doi:10.1039/d0nj00354a), 2020-01-01
Supplement: d0nj00354a1.pdf [file d0nj00354a1.pdf]

COMMUNICATION

Supporting Information

Received 00th January 20xx,  
Accepted 00th January 20xx

DOI: 10.1039/x0xx00000x

**One-pot synthesis of Au-Fe<sub>2</sub>O<sub>3</sub>@SiO<sub>2</sub> core-shell nanoreactors for CO oxidation**

Hongbo Yu,<sup>\*a</sup> Zhengtong Guo, Chunzheng Wu,<sup>a</sup> Shujian Wang,<sup>a</sup> Bin Li,<sup>a</sup> Xuedong Yan,<sup>b</sup> Bo Yan,<sup>a</sup> and Hongfeng Yin<sup>\*a</sup>

<sup>a</sup> Ningbo Institute of Materials Technology and Engineering, Chinese Academy of Sciences, 1219 Zhongguan West Road, Ningbo, Zhejiang 315201, P. R. 11219 Zhongguan West Road, Ningbo, Zhejiang 315201, P. R.

<sup>b</sup> E-mail: yinhf@nimte.ac.cn; yuhongbo@nimte.ac.cn

<sup>c</sup> Ningbo Polytechnic 388 East Lushan Road, Ningbo, Zhejiang, 315800

## Experimental Section

**Materials.** Tetraethyl silicate (TEOS), Polyoxyethylene (10) cetyl ether (Brij® C10),  $\text{FeCl}_3 \cdot 6\text{H}_2\text{O}$ ,  $\text{HAuCl}_4 \cdot x\text{H}_2\text{O}$ , were obtained from Aladdin Reagent Co., Ltd.; anhydrous ethanol, ammonium hydroxide ( $\text{NH}_3 \cdot \text{H}_2\text{O}$ , 15 M), and cyclohexane were purchased from Sinopharm Chemical Reagents Co., Ltd.; All reagents were used directly without further purification. Deionized water was used throughout. The gas mixture (carbon monoxide, 1%;  $\text{O}_2$ , 20%; and the remainder,  $\text{N}_2$ ) were purchased from Shanghai Weichuang Standard Reference Gas Analytical Technology Company.

**Characterization.** XRD patterns were collected on a Bruker AXS D8 Advance diffractometer using  $\text{Cu K}\alpha$  radiation. Diffraction patterns were measured in the  $2\theta$  range from  $10^\circ$  to  $90^\circ$ . XRD samples were prepared by pressuring powders onto a glass plate. TEM images were obtained by a JEOL 2100 transmission electron microscope operated at 200 kV. The high angle annular dark field scanning transition electron microscopy (HAADF-STEM) image with EDS phase mapping of  $\text{Au-Fe}_2\text{O}_3 @ \text{SiO}_2$  nanoparticles were obtained using ThermoFisher Talos F200X. For TEM measurements, catalyst samples were dispersed in ethanol solution and were dropped onto a carbon-coated copper grid followed by solvent evaporation in air at room temperatures. BET surface area, pore size distribution and the adsorption/desorption isotherms of the nanocatalysts were measured by  $\text{N}_2$  adsorption at 77 K, using a Micromeritics ASAP-2020 M automatic specific surface area and porous physical adsorption analyzer. UV-Vis absorption spectra were recorded on a Lambda 950 spectrophotometer at 300~900 nm. The nanoparticles are dispersed in a quartz cuvette.

## Catalyst Preparation.

**Preparation of  $\text{Au-Fe}_2\text{O}_3 @ \text{SiO}_2$  core-shell nanoparticles.** In a typical synthetic process, 4.25 g Brij® C10 was dissolved in 40 mL of cyclohexane at  $50^\circ\text{C}$ . Then, 400  $\mu\text{L}$  of an aqueous solution containing 0.03mmol  $\text{HAuCl}_4$  and 0.03mmol  $\text{FeCl}_3$  was added dropwise with stirring. After 20 min, 0.8 mL of  $\text{NH}_3 \cdot \text{H}_2\text{O}$  (25%) and 1 mL of TEOS were added to the solution in sequence. The reaction mixture was kept stirring for 2.5h to obtain Precursor@ $\text{SiO}_2$  multinuclear/shell nanospheres. The product was centrifuged, washed with ethanol and dried at  $100^\circ\text{C}$  for 12h, and calcined at  $350^\circ\text{C}$  for 2h to obtain  $\text{Au-Fe}_2\text{O}_3 @ \text{SiO}_2$  nanocomposite catalyst.

In the process of synthesizing  $\text{Au-Fe}_2\text{O}_3 @ \text{SiO}_2$  nanocomposite catalyst, the addition amount of  $\text{HAuCl}_4$  was 0.03 mmol, and the addition amount of  $\text{FeCl}_3$  was 0 mmol, 0.01 mmol, 0.03 mmol, 0.06 mmol, 0.09 mmol, respectively, and the resulting products were labeled as  $\text{Au}_3\text{Fe}_0$ ,  $\text{Au}_3\text{Fe}_1$ ,  $\text{Au}_3\text{Fe}_3$ ,  $\text{Au}_3\text{Fe}_6$ ,  $\text{Au}_3\text{Fe}_9$ . And the sample without  $\text{HAuCl}_4$  addition was labeled as  $\text{Au}_0\text{Fe}_3$ . The  $\text{Au-Fe}_2\text{O}_3 @ \text{SiO}_2$  ( $\text{Au}_3\text{Fe}_6$ )nanocomposite catalysts were subjected to thermal pretreatment at 450 and  $550^\circ\text{C}$ , respectively.

**Catalyst Activity Measurements.** The CO catalytic oxidation reaction was carried out in a fix-bed quartz reactor (U-type tube, 6 mm inner diameter). 50 mg of  $\text{Au-Fe}_2\text{O}_3 @ \text{SiO}_2$  nanocatalysts were charged into the U-type reactor, followed the system was pretreated at  $100^\circ\text{C}$  in a Ar flow for 0.5 h and cooled to the room temperature under Ar. And then the gas mixture (carbon monoxide, 1%;  $\text{O}_2$ , 20%; and the remainder,  $\text{N}_2$ ) were allowed to flow through the catalysts at a total flow rate of 30 mL/min at different temperatures for 3 h. The concentrations of CO and  $\text{CO}_2$  were analyzed by FGA-4100 gas analyzer produced by Foshan Analyser Co., Ltd.

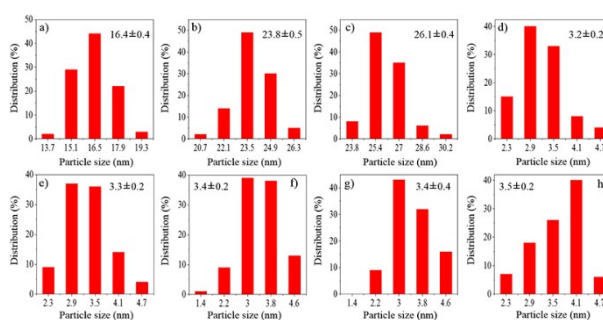

**Figure S1.** Particle size histograms: a)-c)  $\text{Au-Fe}_2\text{O}_3 @ \text{SiO}_2$  nanoparticles( $\text{Au}_1\text{Fe}_3$ ) synthesized at different TEOS concentrations of 0.1M, 0.2 M and 0.3 M, respectively; d)-h)  $\text{Au-Fe}_2\text{O}_3 @ \text{SiO}_2$  nanoparticles with different Au/Fe ratios of  $\text{Au}_3\text{Fe}_0$ ,  $\text{Au}_3\text{Fe}_1$ ,  $\text{Au}_3\text{Fe}_3$ ,  $\text{Au}_3\text{Fe}_6$  and  $\text{Au}_3\text{Fe}_9$ , respectively.

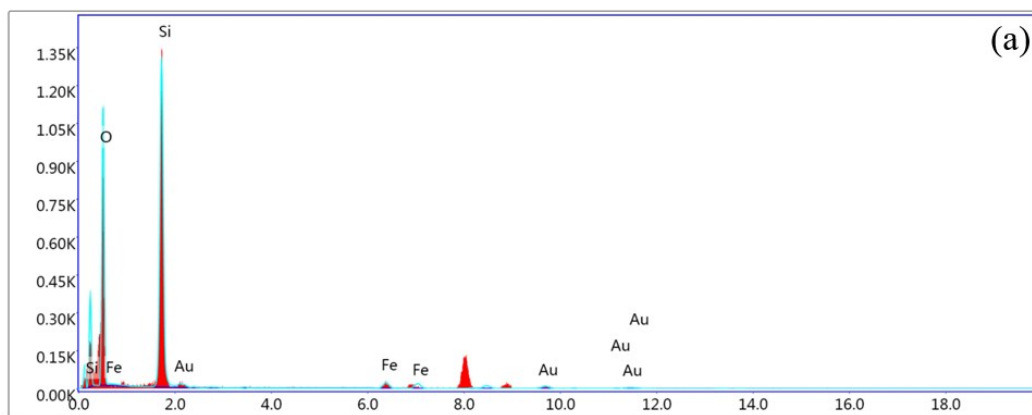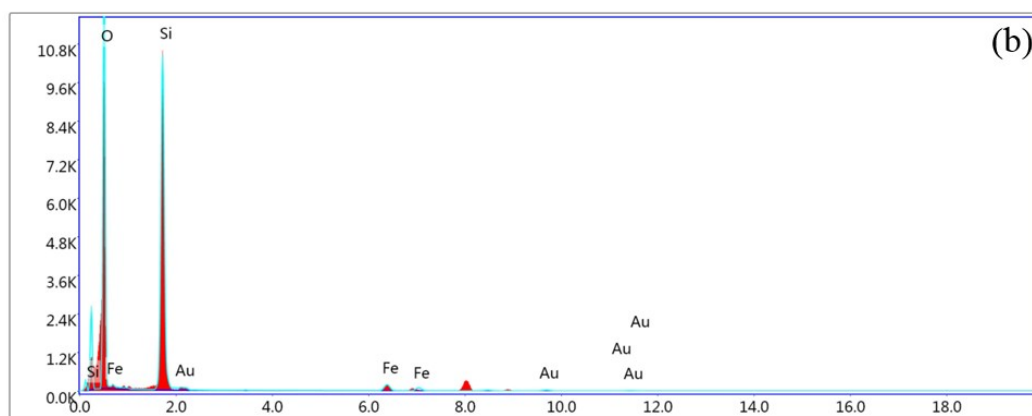

Lsec: 30.0 15 Cnts 4.570 keV Det: Octane Elite TW 55

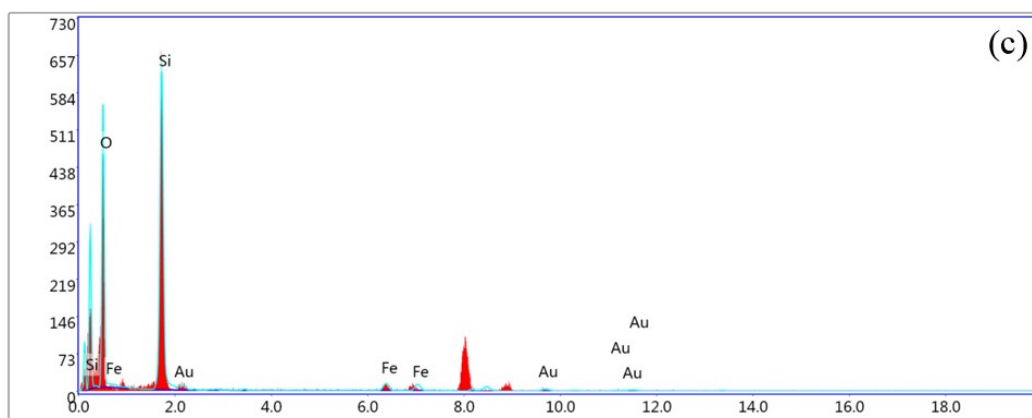

Lsec: 29.9 0 Cnts 0.000 keV Det: Octane Elite TW 55

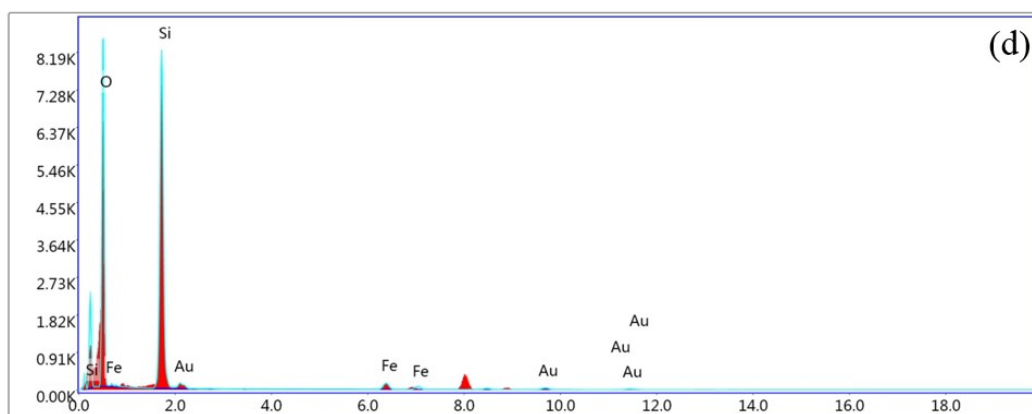

Figure S2. EDS spectra showing: a), Au<sub>3</sub>Fe<sub>1</sub> NPs; b), Au<sub>3</sub>Fe<sub>3</sub> NPs; c), Au<sub>3</sub>Fe<sub>6</sub> NPs; d), Au<sub>3</sub>Fe<sub>9</sub> NPs.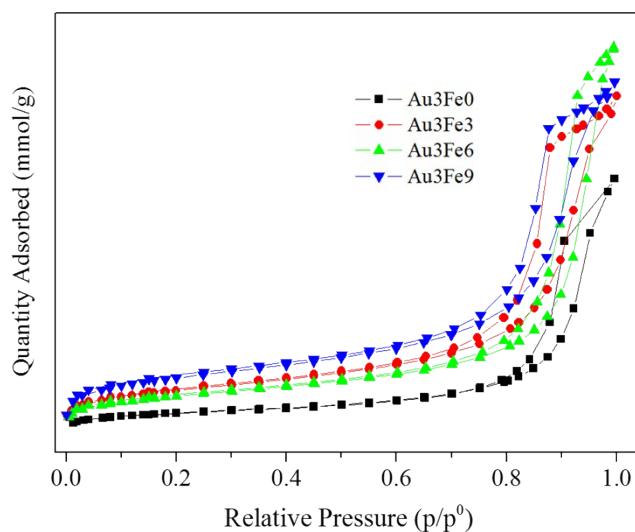Figure S3. N<sub>2</sub> sorption/isortherms and pore size distribution of Au-Fe<sub>2</sub>O<sub>3</sub>@SiO<sub>2</sub> NPs.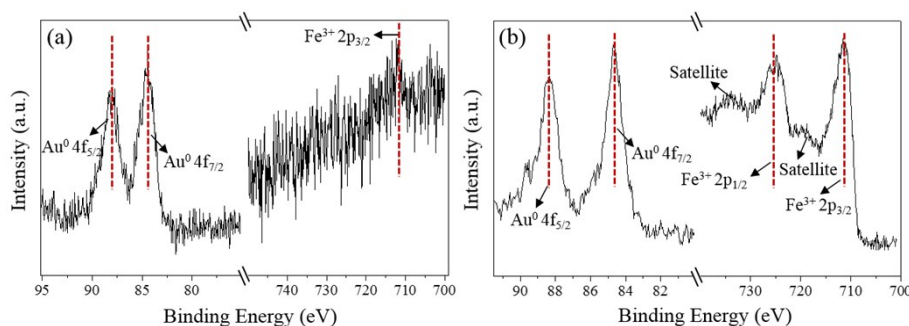Figure S4. XPS spectra showing (a) Au-Fe<sub>2</sub>O<sub>3</sub>@SiO<sub>2</sub>(Au<sub>3</sub>Fe<sub>6</sub>) nanocatalyst calcined in air at 450 °C and (b) Au-Fe<sub>2</sub>O<sub>3</sub>/SiO<sub>2</sub> supported catalyst (The loadings of Au and Fe are 0.05 and 0.088, respectively.) calcined in air at 450 °C.

**Preparation of Au-Fe<sub>2</sub>O<sub>3</sub>/SiO<sub>2</sub> catalysts.** The Au-Fe<sub>2</sub>O<sub>3</sub>/SiO<sub>2</sub> catalysts were prepared by an incipient-wetness impregnation method. A certain amount of HAuCl<sub>4</sub>·xH<sub>2</sub>O and FeCl<sub>3</sub>·6H<sub>2</sub>O (The molar ratio of Au and Fe is 1/3) were dissolved in deionized water, and a calculated amount of silica was added into the above aqueous solutions. After 4 hours, the obtained samples were further dried at 120 °C overnight, and followed by calcination in air at 450 °C for 2 h to obtain Au-Fe<sub>2</sub>O<sub>3</sub>/SiO<sub>2</sub> catalysts.

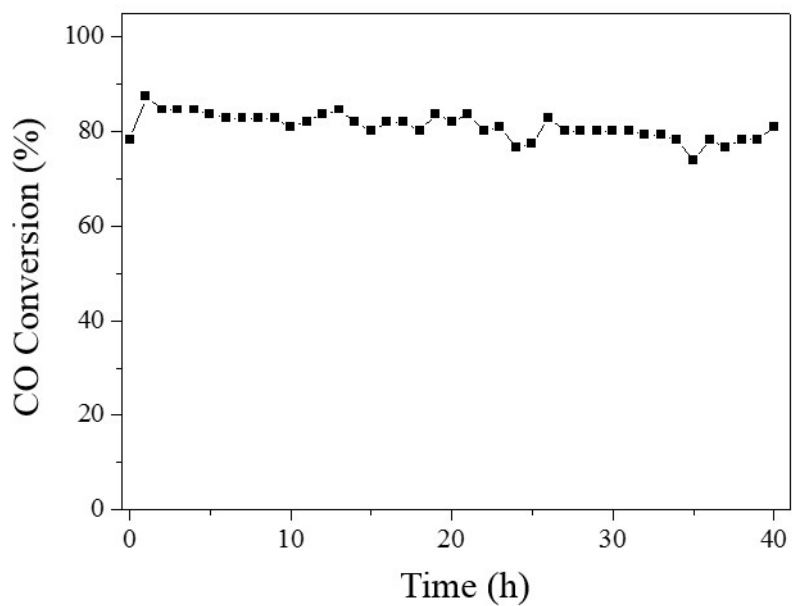

**Figure S5.** The effect of reaction time on CO oxidation over Au<sub>3</sub>Fe<sub>6</sub> nanaocatalyst at 270 °C. Reaction conditions: Au-Fe<sub>2</sub>O<sub>3</sub>@SiO<sub>2</sub> catalysts-50 mg; Gas flow rate-30 mL/min; CO-1% (v/v), O<sub>2</sub>-20% (v/v), and N<sub>2</sub>-79% (v/v).
